# Supplementary material for: Microflora, Contents of Polyamines, Biogenic Amines, and TVB-N in Bovine Offal and Game Meat for the Raw-Feeding of Adult Dogs
Source: MDPI journal article supplement (doi:10.3390/ani13121987), 2023-06-14
Supplement: s1 [file s1]

## SUPPLEMENTARY FILE

**Table S1.** Number of samples according to organ/tissue and supplier.

| supplier* | tongue | lung | heart | liver | spleen | kidney | sum of (red offal) | layrnx, esophagus | rumen | omasum | udder | mix | sum of (other offal & mixes) | wild game meat |
|-----------|--------|------|-------|-------|--------|--------|--------------------|-------------------|-------|--------|-------|-----|------------------------------|----------------|
| l         | 5      | 1    | 1     |       |        |        | 7                  | 1                 | 3     | 1      | 2     |     | 7                            | 2              |
| h         |        | 1    | 2     | 1     | 1      | 1      | 6                  |                   | 3     | 1      |       |     | 4                            | 4              |
| n         |        |      | 1     |       |        |        | 1                  | 2                 | 1     |        | 3     | 1   | 7                            | 1              |
| p         | 1      | 1    | 1     | 1     | 1      | 1      | 6                  |                   | 1     | 1      |       | 1   | 3                            |                |
| f         |        |      |       |       |        |        | 0                  | 1                 | 1     | 1      |       | 1   | 4                            | 2              |
| e         |        |      | 1     | 1     |        | 1      | 3                  | 3                 | 1     | 1      |       |     | 5                            |                |
| o         |        | 1    | 2     | 1     | 1      | 1      | 6                  |                   | 1     |        | 1     | 2   | 4                            | 2              |
| c         |        |      |       |       |        |        | 0                  | 1                 | 1     |        |       | 1   | 3                            |                |
| s         |        | 1    | 1     | 1     |        |        | 3                  |                   | 1     |        | 1     | 1   | 3                            | 1              |
| b         |        |      |       | 1     | 1      | 1      | 3                  |                   |       | 1      |       | 1   | 2                            |                |
| d         |        | 1    | 2     | 1     | 2      |        | 6                  |                   |       | 1      |       | 2   | 3                            |                |
| k         |        |      |       |       |        |        |                    |                   |       |        |       |     |                              | 1              |
| sum       | 6      | 6    | 11    | 7     | 6      | 5      | 41                 | 8                 | 12    | 8      | 7     | 10  | 45                           | 13             |

\* initial letter of the name of the company
